# Supplementary material
Source: Research Square preprint supplement (doi:10.21203/rs.3.rs-7424882/v1)
Supplement: Supplementary file 1 [file d848cd761a56eb95258133fd.pdf]

## Supplementary Information

**a**

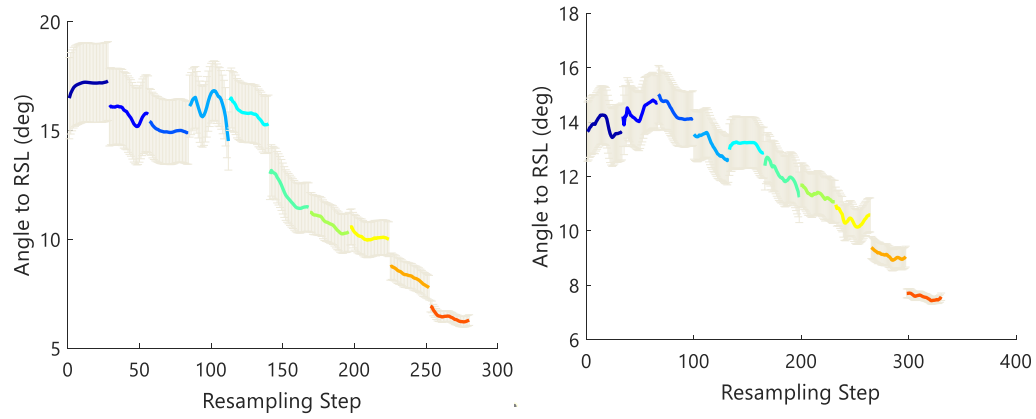

**Supplementary Fig. 1:** a. Angle to the RSL across all single-report events for the SAME (left) and DIFF (right) groups.
